# Supplementary material
Source: Springer Nature journal article supplement (https://www.springermedizin.de/resource/supplementary/12939_2010_204_MOESM1_ESM.PDF/9550590)
Supplement: MOESM1 [file 9550590]

## **Appendix**

This article includes three words (Gardasil<sup>®</sup>/Silgard<sup>®</sup> and Cervarix<sup>™</sup>) that are or are asserted to be proprietary terms or trademarks. Their inclusion does not imply they have acquired for legal purposes a non-proprietary or general significance, nor is any other judgment implied concerning their legal status.
